# Supplementary material for: Effects of Antibody Response after Booster Vaccination on SARS-CoV-2 Breakthrough Infections and Disease Outcomes in Advanced Cancer Patients: A Prospective Analysis of the Vax-on-Third Study
Source: MDPI journal article supplement (doi:10.3390/curroncol30050386), 2023-05-17
Supplement: s1 [file s1]

## SUPPLEMENTARY MATERIAL

### Effects of antibody response after booster vaccination on SARS-CoV-2 breakthrough infections and disease outcomes in advanced cancer patients: A prospective analysis of the Vax-On-Third study.

Fabrizio Nelli <sup>1,\*</sup>, Agnese Fabbri <sup>1</sup>, Antonella Virtuoso <sup>1</sup>, Diana Giannarelli <sup>2</sup>, Julio Rodrigo Giron Berrios <sup>1</sup>, Eleonora Marrucci <sup>1</sup>, Cristina Fiore <sup>1</sup>, Marta Schirripa <sup>1</sup>, Carlo Signorelli <sup>1</sup>, Mario Giovanni Chilelli <sup>1</sup>, Francesca Primi <sup>1</sup>, Gloria Pessina <sup>3</sup>, Federica Natoni <sup>3</sup>, Maria Assunta Silvestri <sup>4</sup>, and Enzo Maria Ruggeri <sup>1</sup>

<sup>1</sup> Department of Oncology and Hematology, Medical Oncology Unit, Central Hospital of Belcolle, Viterbo, Italy

<sup>2</sup> Biostatistics Unit, Scientific Directorate, Fondazione Policlinico Universitario A. Gemelli, IRCCS, Rome, Italy

<sup>3</sup> Department of Oncology and Hematology, Molecular Biology and Covid Diagnostics, Central Hospital of Belcolle, Viterbo, Italy

<sup>4</sup> Department of Oncology and Hematology, Microbiology and Virology Unit, Central Hospital of Belcolle, Viterbo, Italy

\* **Correspondence:** Fabrizio Nelli, MD; Department of Oncology and Hematology, Medical Oncology Unit, Central Hospital of Belcolle, Strada Sammartinese snc, 01100 Viterbo, Italy, Phone +390761339055, Fax +390761339039, e-mail: [fabrizio.nelli@asl.vt.it](mailto:fabrizio.nelli@asl.vt.it), ORCID iD: 0000-0001-8374-1362

Supplementary Table S1. Analysis of antibody response by predefined clinical variables

|                        | Univariate analysis                                                |                      | Multivariate analysis                                      |                      |
|------------------------|--------------------------------------------------------------------|----------------------|------------------------------------------------------------|----------------------|
| Covariates             | Anti-RBD-S1 IgG titer (BAU),<br>median of absolute values (95% CI) | P value <sup>†</sup> | Beta (95% CI),<br>anti-RBD-S1 IgG titer logarithmic values | P value <sup>†</sup> |
| Sex                    |                                                                    | 0.002                |                                                            |                      |
| - female               | 2121 (1698-2762)                                                   |                      | 1.00                                                       | -                    |
| - male                 | 1158 (747-1937)                                                    |                      | -0.12 (-0.27 to 0.02)                                      | 0.105                |
| Age (years)            |                                                                    | 0.237                |                                                            |                      |
| - ≤55                  | 1295 (755-2043)                                                    |                      | 1.00                                                       | -                    |
| - >55                  | 1862 (1385-2323)                                                   |                      | 0.01 (-0.15 to 0.16)                                       | 0.933                |
| Cancer type            |                                                                    | <0.001               |                                                            |                      |
| - breast <sup>a</sup>  | 3226 (2323-4134)                                                   |                      | 1.00                                                       | -                    |
| - lung                 | 767 (505-1252)                                                     |                      | -0.09 (-0.31 to 0.13)                                      | 0.421                |
| - colorectal           | 2064 (1256-3130)                                                   |                      | 0.15 (-0.07 to 0.38)                                       | 0.188                |
| - others               | 1343 (926-2334)                                                    |                      | -0.13 (-0.32 to 0.06)                                      | 0.194                |
| ECOG PS                |                                                                    | 0.001                |                                                            |                      |
| - 0 <sup>a</sup>       | 2353 (1768-3531)                                                   |                      | 1.00                                                       | -                    |
| - 1                    | 1578 (1188-1921)                                                   |                      | 0.03 (-0.10 to 0.17)                                       | 0.637                |
| - 2                    | 282 (101-2307)                                                     |                      | -0.27 (-0.53 to -0.01)                                     | 0.036                |
| Treatment setting      |                                                                    | 0.978                |                                                            |                      |
| - advanced, first line | 1746 (1213-2182)                                                   |                      | 1.00                                                       | -                    |

|                                        |                  |        |                        |        |
|----------------------------------------|------------------|--------|------------------------|--------|
| - second or later line                 | 2067 (1331-2531) |        | -0.10 (-0.24 to 0.04)  | 0.177  |
| Corticosteroid therapy                 |                  | 0.001  |                        |        |
| - no                                   | 1981 (1569-2323) |        | 1.00                   | -      |
| - yes                                  | 767 (291-1637)   |        | -0.12 (-0.30 to 0.05)  | 0.170  |
| Type of active treatment               |                  | 0.012  |                        |        |
| - targeted therapy <sup>a</sup>        | 2019 (1358-3108) |        | 1.00                   | -      |
| - cytotoxic chemotherapy               | 1289 (737-2327)  |        | 0.14 (-0.01 to 0.31)   | 0.082  |
| - immune checkpoint inhibitors         | 1412 (1158-1981) |        | 0.14 (-0.07 to 0.35)   | 0.208  |
| - hormonal therapy                     | 4122 (2934-5836) |        | 0.12 (-0.15 to 0.40)   | 0.385  |
| - cytotoxic chemotherapy and biologics | 1209 (390-1843)  |        | -0.04 (-0.28 to 0.20)  | 0.737  |
| COVID-19 infection                     |                  | <0.001 |                        |        |
| - no                                   | 2798 (2323-3613) |        | 1.00                   | -      |
| - yes                                  | 291 (210-505)    |        | -0.96 (-1.10 to -0.81) | <0.001 |

<sup>†</sup>P values derived from Mann-Whitney *U* test or Kruskal-Wallis test; <sup>‡</sup>P values derived from parametric 2-sided Wald's  $\chi^2$  test with Bonferroni ( $\alpha$  =0.01) correction for multiple comparisons. A two-sided P value of <0.05 was considered statistically significant.

<sup>a</sup> Reference category. RBD-S1, receptor binding domain of SARS-CoV-2 spike protein; BAU, binding antibody units; OR, odds ratio; CI, confidence intervals; ECOG PS, Eastern Cooperative Oncology Group Performance Status. Corticosteroid therapy indicates  $\geq 10$  mg prednisone equivalent daily for at least 7 days at any time after the third dose of vaccine. High response indicates the subgroup of patients with an anti-RBD-S1 IgG titer  $\geq 803$  BAU/mL after the third dose of vaccine; low response indicates the subgroup of patients with an anti-RBD-S1 IgG titer <803 BAU/mL after the third dose of vaccine.

Supplementary Figure S1. Vaccine-related time-to-treatment failure depending on clinical variables

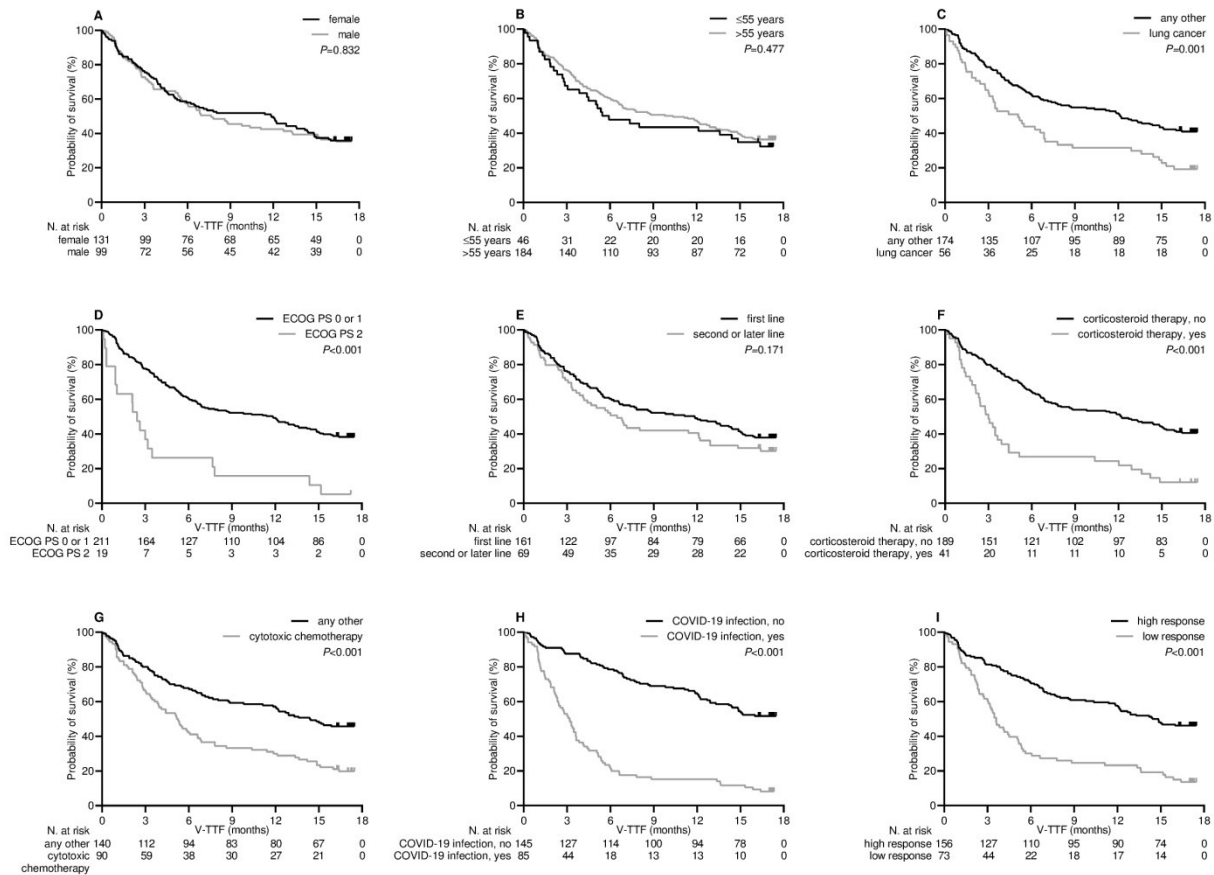

A. Sex: female vs male; B. Age group:  $\leq 55$  years vs  $>55$  years; C. any other cancer diagnosis vs lung cancer diagnosis; D. Eastern Cooperative Oncology Group Performance Status (ECOG PS): 0 or 1 vs 2; E. Treatment setting: advanced, first line vs advanced, second or later line; F. Corticosteroid therapy ( $\geq 10$  mg prednisone equivalent daily for at least 7 days at any time after the third dose of vaccine): no vs yes; G. Type of active treatment: any other vs cytotoxic chemotherapy based; H. COVID-19 infection: no vs yes; I. Level of antibody response: high response (subgroup of patients with an anti-RBD-S1 IgG titer  $\geq 803$  BAU/mL after the third dose of vaccine vs low response (subgroup of patients with an anti-RBD-S1 IgG titer  $< 803$  AU/mL after the third dose of vaccine).
